# Supplementary material for: Metabolic engineering Escherichia coli for efficient production of icariside D2
Source: PubMed Central journal article supplement (PMC6833136; doi:10.1186/s13068-019-1601-x), 2019-11-06

A

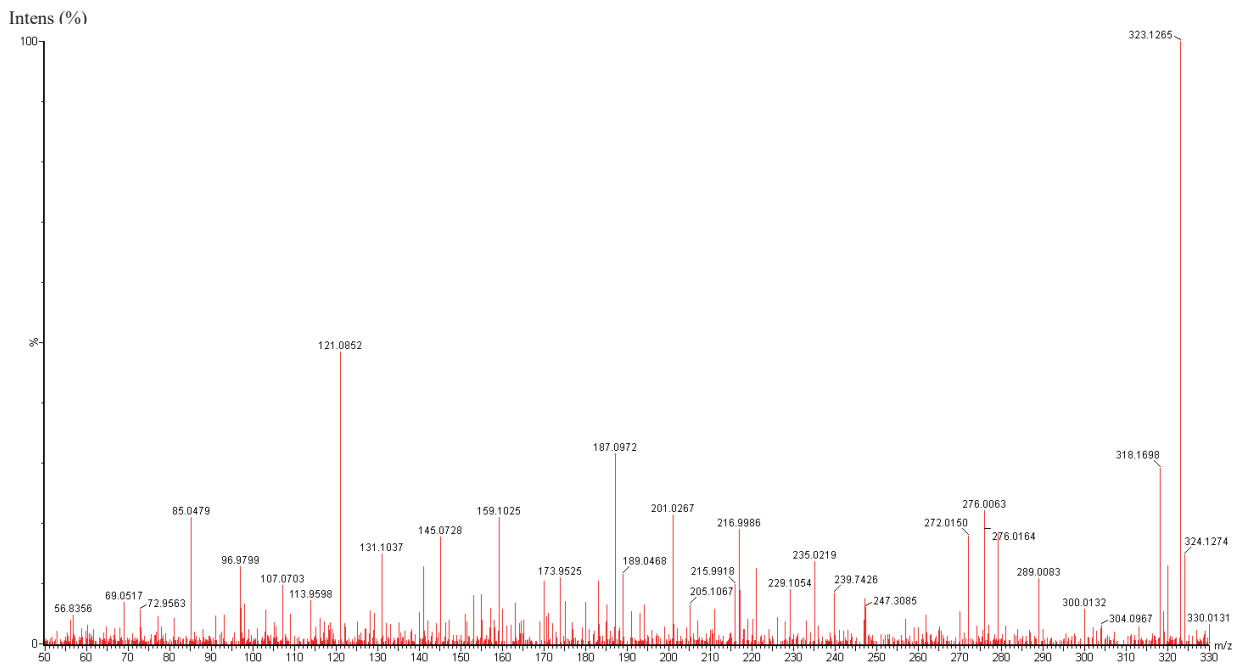

B

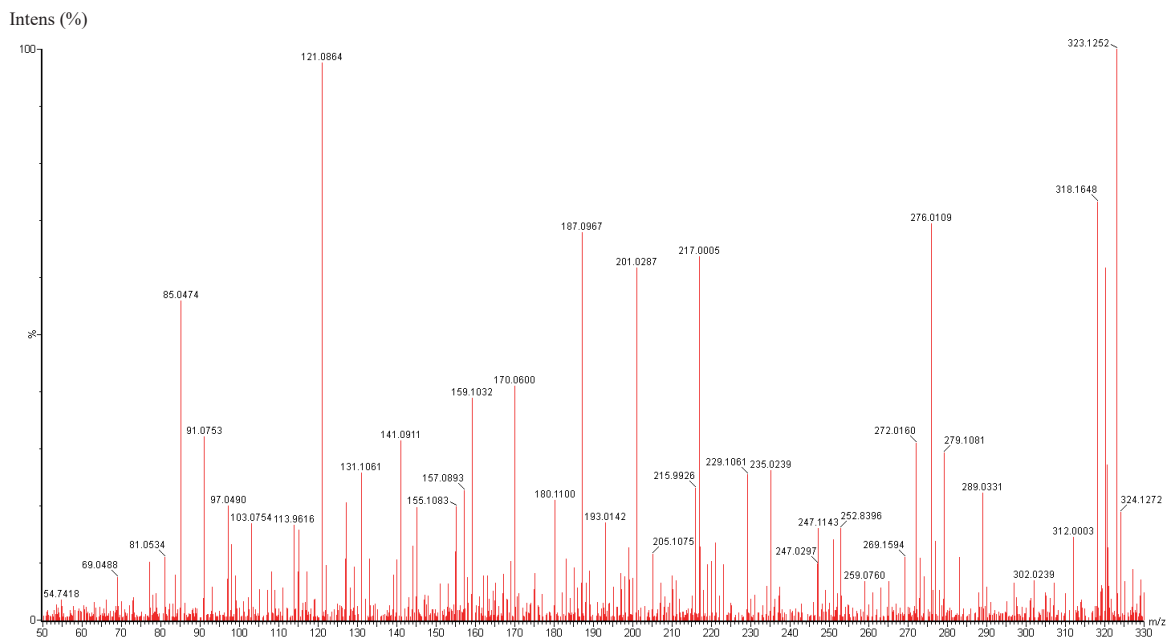

Supplement: 13068_2019_1601_MOESM3_ESM.pdf [file 13068_2019_1601_MOESM3_ESM.pdf]
